# Supplementary material
Source: bioRxiv or medRxiv preprint supplement (https://www.biorxiv.org/highwire/filestream/90987/field_highwire_adjunct_files/0/214866-1.pdf)

## Competitive ability of a tetraploid selfing species (*Capsella bursa-pastoris*) across its expansion range and comparison with its sister species – Supplementary material

---

*Xuyue Yang, Martin Lascoux and Sylvain Glémin*

**Table S1: List of accessions**

| <b>Species</b> | <b>Country</b> | <b>Area for Cbp</b> | <b>Latitude</b> | <b>Longitude</b> | <b>Accession_number</b> |
|----------------|----------------|---------------------|-----------------|------------------|-------------------------|
| Cr             | Italy          |                     | 39.36           | 16.23            | 75.13                   |
| Cr             | Italy          |                     | 39.36           | 16.23            | 79.17                   |
| Cr             | Spain          |                     | 43.09           | 6.25             | 82.16                   |
| Cr             | Italy          |                     | 40.94           | 15.20            | 73.6                    |
| Cr             | Greece         |                     | 38.09           | 22.40            | 74.9                    |
| Cr             | Greece         |                     | 37.69           | 21.63            | 84.2                    |
| Cr             | Greece         |                     | 37.73           | 21.69            | 80.15                   |
| Cr             | Greece         |                     | 39.56           | 20.92            | 80.2                    |
| Cr             | Greece         |                     | 39.56           | 20.92            | 80.13                   |
| Cr             | France         |                     | 45.81           | 5.77             | 83.2                    |
| Cr             | Greece         |                     | 39.56           | 20.92            | 82.17                   |
| Cr             | France         |                     | 43.39           | 0.05             | VIC-FR7-2               |
| Cr             | France         |                     | 43.39           | 0.05             | VIC-FR7-3               |
| Cr             | France         |                     | 43.39           | 0.05             | VIC-FR7-4               |
| Cr             | France         |                     | 43.33           | 0.10             | TOS-FR8-3               |
| Cr             | France         |                     | 43.33           | 0.10             | TOS-FR8-4               |
| Cr             | France         |                     | 43.33           | 0.10             | TOS-FR8-6               |
| Cr             | France         |                     | 45.00           | 2.50             | VIB-FR10-1              |
| Cr             | France         |                     | 45.00           | 2.50             | VIB-FR10-2              |
| Cr             | France         |                     | 45.00           | 2.50             | VIB-FR10-3              |
| Cr             | France         |                     | 42.67           | 0.66             | AUZ-FR11-2              |
| Cr             | France         |                     | 42.67           | 0.66             | AUZ-FR11-5              |
| Cr             | France         |                     | 43.33           | 4.85             | MOS-FR12-3              |
| Cr             | Greece         |                     | 40.65           | 22.90            | THE-GR2-1               |
| Cr             | Greece         |                     | 40.65           | 22.90            | THE-GR2-4               |
| Cr             | Greece         |                     | 40.65           | 22.90            | THE-GR2-5               |
| Cr             | Palestine      |                     | 32.23           | 35.26            | NAB-PAL1-6              |
| Cr             | Palestine      |                     | 32.23           | 35.26            | NAB-PAL1-7              |
| Cr             | Palestine      |                     | 32.23           | 35.26            | NAB-PAL3-4              |
| Cr             | Palestine      |                     | 32.23           | 35.26            | NAB-PAL3-5              |
| Cr             | Palestine      |                     | 32.23           | 35.26            | NAB-PAL3-9              |
| Cg             | Greece         |                     | 39.80           | 21.27            | 28                      |

|     |         |        |       |       |       |
|-----|---------|--------|-------|-------|-------|
| Cg  | Albania |        | 39.92 | 20.21 | 1     |
| Cg  | Albania |        | 39.91 | 20.01 | 25    |
| Cg  | Albania |        | 40.49 | 19.83 | 28    |
| Cg  | Greece  |        | 39.80 | 21.27 | 16    |
| Cg  | Greece  |        | 39.80 | 21.27 | 86.1  |
| Cg  | Greece  |        | 39.80 | 21.27 | 86.9  |
| Cg  | Greece  |        | 39.80 | 21.27 | 87.26 |
| Cg  | Greece  |        | 39.80 | 21.27 | 87.32 |
| Cg  | Greece  |        | 39.80 | 21.27 | 88.5  |
| Cg  | Greece  |        | 39.80 | 21.27 | 96.6  |
| Cg  | Greece  |        | 39.80 | 21.27 | 96.7  |
| Cg  | Greece  |        | 39.80 | 21.27 | 99.22 |
| Co  | Russia  |        | 51.29 | 58.18 | 2     |
| Co  | Russia  |        | 51.29 | 58.18 | 4     |
| Co  | Russia  |        | 51.29 | 58.18 | 6     |
| Co  | Russia  |        | 51.29 | 58.18 | 5     |
| Co  | Russia  |        | 53.30 | 60.10 | 2     |
| Co  | Russia  |        | 53.30 | 60.10 | 3     |
| Co  | Russia  |        | 53.30 | 60.10 | 4     |
| Co  | Russia  |        | 53.30 | 60.10 | 5     |
| Co  | Russia  |        | 54.32 | 62.68 | 3     |
| Co  | Russia  |        | 54.32 | 62.68 | 4     |
| Co  | Russia  |        | 54.32 | 62.68 | 6     |
| Co  | Russia  |        | 54.32 | 62.68 | 7     |
| Co  | China   |        | 46.70 | 90.83 | 1     |
| Co  | China   |        | 46.70 | 90.83 | 2     |
| Co  | China   |        | 46.70 | 90.83 | 4     |
| Co  | China   |        | 46.70 | 90.83 | 10    |
| Co  | Russia  |        | 55.11 | 61.39 | 4     |
| Co  | Russia  |        | 55.11 | 61.39 | 7     |
| Co  | Russia  |        | 55.11 | 61.39 | 9     |
| Co  | Russia  |        | 53.30 | 60.10 | par9  |
| Cbp | France  | Europe | 48.08 | 7.37  | FR50  |
| Cbp | France  | Europe | 44.51 | -1.21 | STJ2  |
| Cbp | Suède   | Europe | 56.15 | 13.77 | SE33  |
| Cbp | UK      | Europe | 56.20 | -2.47 | STA4  |
| Cbp | Suède   | Europe | 62.64 | 17.94 | SE14  |
| Cbp | Suède   | Europe | 59.87 | 17.63 | SE42  |
| Cbp | Italy   | Europe | 41.17 | 13.57 | 22_17 |
| Cbp | Italy   | Europe | 37.09 | 15.20 | 39_12 |
| Cbp | Espagne | Europe | 42.24 | 1.50  | 53_7  |
| Cbp | France  | Europe | 44.33 | -0.21 | 6_19  |

|     |                    |             |       |        |         |
|-----|--------------------|-------------|-------|--------|---------|
| Cbp | Czech Republic     | Europe      | 49.20 | 16.63  | CZ96    |
| Cbp | Greece             | Europe      | 36.17 | 28.00  | GR90    |
| Cbp | Bosnia_Hercegovina | Europe      | 43.51 | 18.25  | TON_4   |
| Cbp | Russia             | Europe      | 50.55 | 128.28 | BEL_6   |
| Cbp | Russia             | Europe      | 51.23 | 109.51 | BAD_1   |
| Cbp | Russia             | Europe      | 52.16 | 104.18 | IRRU3   |
| Cbp | Russia             | Europe      | 48.28 | 135.05 | KAB_5   |
| Cbp | Russia             | Europe      | 53.44 | 119.45 | MOG_1   |
| Cbp | Russia             | Europe      | 43.13 | 131.40 | VLA_3   |
| Cbp | Russia             | Europe      | 51.39 | 39.11  | VORU1   |
| Cbp | Russia             | Europe      | 49.00 | 131.03 | OBL_4   |
| Cbp | Turkey             | Middle-East | 41.02 | 28.97  | TR73    |
| Cbp | Jordan             | Middle-East | 31.97 | 35.98  | J056    |
| Cbp | Algeria            | Middle-East | 35.45 | 7.96   | AL87    |
| Cbp | Jordan             | Middle-East | 31.97 | 35.98  | J059    |
| Cbp | Israel             | Middle-East | 32.60 | 35.13  | MAE_4   |
| Cbp | Algeria            | Middle-East | 36.77 | 5.08   | AL88    |
| Cbp | Syria              | Middle-East | 33.50 | 36.30  | SY64    |
| Cbp | Syria              | Middle-East | 35.33 | 40.15  | SY67    |
| Cbp | Syria              | Middle-East | 36.20 | 37.17  | SY68    |
| Cbp | China              | Asia        | 38.56 | 121.35 | DL_174  |
| Cbp | China              | Asia        | 30.20 | 112.06 | JZH152  |
| Cbp | China              | Asia        | 26.53 | 112.33 | HY85    |
| Cbp | China              | Asia        | 30.16 | 120.13 | HJC419  |
| Cbp | China              | Asia        | 32.03 | 118.46 | NJ219   |
| Cbp | China              | Asia        | 37.55 | 112.32 | TY118   |
| Cbp | China              | Asia        | 23.97 | 120.95 | PL      |
| Cbp | China              | Asia        | 26.37 | 106.43 | GY_35   |
| Cbp | China              | Asia        | 30.31 | 117.05 | AQ_413  |
| Cbp | China              | Asia        | 39.55 | 116.22 | BJA162  |
| Cbp | China              | Asia        | 39.56 | 116.20 | BJB_240 |
| Cbp | China              | Asia        | 28.12 | 113.05 | CSH_8   |
| Cbp | China              | Asia        | 36.36 | 114.29 | HD_70   |
| Cbp | China              | Asia        | 31.51 | 117.17 | HF_254  |
| Cbp | China              | Asia        | 30.16 | 120.13 | HJC_418 |
| Cbp | China              | Asia        | 45.45 | 126.37 | HRB_137 |
| Cbp | China              | Asia        | 30.12 | 115.06 | HSH_298 |
| Cbp | China              | Asia        | 29.39 | 115.59 | JJ_392  |
| Cbp | China              | Asia        | 25.05 | 102.41 | KMA_373 |
| Cbp | China              | Asia        | 25.06 | 102.41 | KMB_215 |
| Cbp | China              | Asia        | 27.37 | 113.50 | PX_269  |
| Cbp | China              | Asia        | 35.36 | 116.58 | QF_341  |

|     |              |              |       |        |             |
|-----|--------------|--------------|-------|--------|-------------|
| Cbp | China        | Asia         | 33.57 | 107.45 | TSB         |
| Cbp | China        | Asia         | 39.38 | 118.11 | TSH_191     |
| Cbp | China        | Asia         | 30.37 | 114.16 | WH_46       |
| Cbp | China        | Asia         | 34.16 | 108.52 | XA_110      |
| Cbp | China        | Asia         | 36.37 | 101.46 | XN_442      |
| Cbp | China        | Asia         | 32.09 | 114.04 | XY_18       |
| Cbp | China        | Asia         | 27.47 | 114.23 | YC_312      |
| Cbp | China        | Asia         | 28.36 | 112.18 | YY_381      |
| Cbp | China        | Asia         | 34.45 | 113.40 | ZZH_279     |
| Cbp | Russia       | Central_asia | 51.53 | 58.85  | DUB-RUS9    |
| Cbp | Kazakhstan   | Central_asia | 47.00 | 83.01  | TACH-CHIN14 |
| Cbp | Kirghizistan | Central_asia | 40.00 | 72.00  | KIRG-3-14   |
| Cbp | Kirghizistan | Central_asia | 40.00 | 73.00  | KIRG-7      |

**Table S2: Genetic diversity of the 62 *Capsella bursa-pastoris* sampling sites analysed in (Cornille et al. 2016).**

n: number of individuals, S: number of usable nucleotides, missing data: percentage of missing SNPs per individual,  $\pi$ : mean standardize pairwise difference

| Country            | Site    | n | Latitude | Longitude | S    | Missing data (%) | $\pi$  |
|--------------------|---------|---|----------|-----------|------|------------------|--------|
| Italy              | IT22    | 2 | 41.17    | 13.57     | 3736 | 31.8             | 0.0020 |
| Italy              | IT39    | 6 | 37.09    | 15.2      | 3796 | 33.7             | 0.0016 |
| Spain              | SP53    | 6 | 42.24    | 1.5       | 3790 | 20.5             | 0.0018 |
| France             | FR6     | 8 | 44.33    | -0.21     | 3774 | 14.8             | 0.0016 |
| Algeria            | AL87    | 1 | 35.45    | 7.96      | 3923 | 13.2             | 0.0018 |
| Algeria            | AL88    | 1 | 36.77    | 5.08      | 3896 | 27.2             | 0.0023 |
| Russia             | BAD     | 5 | 51.23    | 109.51    | 3833 | 12.9             | 0.0012 |
| Russia             | BEL     | 5 | 50.55    | 128.28    | 3813 | 37.4             | 0.0014 |
| Czech Republic     | CZ96    | 1 | 49.2     | 16.63     | 3860 | 17.5             | 0.0017 |
| France             | FR50    | 1 | 48.08    | 7.37      | 3892 | 31.9             | 0.0015 |
| Greece             | GR90    | 1 | 36.17    | 28        | 3655 | 22.8             | 0.0007 |
| Russian            | IRRU    | 2 | 52.16    | 104.18    | 3874 | 16.9             | 0.0016 |
| Jordan             | JO      | 2 | 31.97    | 35.98     | 3842 | 20.8             | 0.0018 |
| Russia             | KAB     | 6 | 48.28    | 135.05    | 3758 | 17.7             | 0.0014 |
| Italy              | MAE     | 6 | 32.6     | 35.13     | 3726 | 23.2             | 0.0023 |
| Russia             | MOG     | 6 | 53.44    | 119.45    | 3720 | 17.9             | 0.0023 |
| Russia             | OBL-RU5 | 6 | 49       | 131.03    | 3667 | 35.0             | 0.0027 |
| Bosnia Herzegovina | SABO    | 6 | 43.51    | 18.25     | 3594 | 12.8             | 0.0034 |
| Sweden             | SE14    | 1 | 62.64    | 17.94     | 3884 | 26.5             | 0.0023 |
| Sweden             | SE33    | 1 | 56.15    | 13.77     | 3902 | 26.0             | 0.0021 |
| Sweden             | SE4x    | 2 | 59.87    | 17.63     | 3784 | 24.4             | 0.0031 |
| United Kingdom     | STA     | 3 | 56.2     | -2.47     | 3763 | 16.9             | 0.0027 |
| France             | STJ     | 2 | 44.51    | -1.21     | 3843 | 20.6             | 0.0021 |
| Syria              | SY6x    | 2 | 33.5     | 36.3      | 3760 | 20.5             | 0.0027 |
| Syria              | SY67    | 1 | 35.33    | 40.15     | 3813 | 36.8             | 0.0031 |
| Syria              | SY7x    | 3 | 36.2     | 37.17     | 3859 | 23.0             | 0.0027 |
| United Kingdom     | TON     | 3 | 58.28    | -4.25     | 3823 | 26.2             | 0.0030 |
| Turkey             | TR      | 5 | 41.02    | 28.97     | 3760 | 16.3             | 0.0019 |
| United States      | US721   | 1 | 35.42    | -119.05   | 3768 | 27.6             | 0.0019 |
| United States      | US740   | 1 | 39.5     | -119.78   | 3795 | 14.0             | 0.0016 |
| Russia             | VLA     | 6 | 43.13    | 131.4     | 3851 | 9.6              | 0.0011 |
| Russia             | VORU    | 4 | 51.39    | 39.11     | 3922 | 27.2             | 0.0018 |
| United States      | WAC     | 6 | 31.29    | -97.17    | 3875 | 17.5             | 0.0013 |
| China              | AQ      | 6 | 30.31    | 117.05    | 3856 | 16.8             | 0.0010 |

|        |     |   |       |        |      |      |        |
|--------|-----|---|-------|--------|------|------|--------|
| China  | BJA | 1 | 39.55 | 116.22 | 3882 | 8.7  | 0.0010 |
| China  | BJB | 5 | 39.56 | 116.2  | 3835 | 13.9 | 0.0013 |
| China  | CSH | 6 | 28.12 | 113.05 | 3788 | 39.3 | 0.0011 |
| China  | DL  | 5 | 38.56 | 121.35 | 3892 | 46.1 | 0.0011 |
| China  | GY  | 5 | 26.37 | 106.43 | 3887 | 17.9 | 0.0016 |
| China  | HD  | 7 | 36.36 | 114.29 | 3858 | 28.1 | 0.0016 |
| China  | HF  | 5 | 31.51 | 117.17 | 3823 | 18.7 | 0.0015 |
| China  | HJC | 4 | 30.16 | 120.13 | 3753 | 16.0 | 0.0027 |
| China  | HRB | 3 | 45.45 | 126.37 | 3745 | 19.9 | 0.0022 |
| China  | HSH | 5 | 30.12 | 115.06 | 3796 | 36.2 | 0.0016 |
| China  | HY  | 4 | 26.53 | 112.33 | 3814 | 19.8 | 0.0020 |
| China  | JJ  | 6 | 29.39 | 115.59 | 3848 | 12.5 | 0.0017 |
| China  | JZH | 6 | 30.2  | 112.06 | 3746 | 23.9 | 0.0020 |
| China  | KMA | 3 | 25.05 | 102.41 | 3772 | 21.0 | 0.0019 |
| China  | KMB | 5 | 25.06 | 102.41 | 3888 | 38.6 | 0.0024 |
| China  | NCH | 7 | 28.45 | 115.51 | 3748 | 19.4 | 0.0021 |
| China  | NJ  | 7 | 32.03 | 118.46 | 3843 | 24.8 | 0.0014 |
| Taiwan | PL  | 1 | 23.97 | 120.95 | 3832 | 20.1 | 0.0018 |
| China  | PX  | 6 | 27.37 | 113.5  | 3901 | 20.1 | 0.0022 |
| China  | QD  | 4 | 36.05 | 120.2  | 3796 | 30.6 | 0.0022 |
| China  | QF  | 4 | 35.36 | 116.58 | 3867 | 53.5 | 0.0012 |
| China  | TBS | 1 | 33.57 | 107.45 | 3809 | 10.7 | 0.0017 |
| China  | TSH | 3 | 39.38 | 118.11 | 3915 | 3.8  | 0.0022 |
| China  | TY  | 6 | 37.55 | 112.32 | 1573 | 21.5 | 0.0014 |
| China  | WH  | 5 | 30.37 | 114.16 | 3844 | 18.5 | 0.0013 |
| China  | XA  | 1 | 34.16 | 108.52 | 3852 | 36.5 | 0.0013 |
| China  | XN  | 7 | 36.37 | 101.46 | 3869 | 13.2 | 0.0011 |
| China  | XY  | 6 | 32.09 | 114.04 | 3849 | 10.5 | 0.0013 |
| China  | YC  | 4 | 27.47 | 114.23 | 3736 | 31.2 | 0.0020 |
| China  | YY  | 6 | 28.36 | 112.18 | 3796 | 20.1 | 0.0016 |
| China  | ZZH | 5 | 34.45 | 113.4  | 3790 | 36.0 | 0.0018 |

**Table S3: Comparison of the effect of competition among species: contrasts on the “species x treatment” term for flower numbers**

The retained model was:

block + rosette + species + treatment + block x species + rosette x treatment + species x treatment

p-values  $\leq 0.05$  are in bold

| Contrast                                          | LR    | p-value         |
|---------------------------------------------------|-------|-----------------|
| <i>C. grandiflora</i> vs <i>C. bursa-pastoris</i> | 7.57  | <b>0.007</b>    |
| <i>C. grandiflora</i> vs <i>C. orientalis</i>     | 44.27 | <b>8.59-11</b>  |
| <i>C. grandiflora</i> vs <i>C. rubella</i>        | 51.72 | <b>3.84e-12</b> |
| <i>C. bursa-pastoris</i> vs <i>C. orientalis</i>  | 32.59 | <b>1.71-08</b>  |
| <i>C. bursa-pastoris</i> vs <i>C. rubella</i>     | 41.89 | <b>1.93-10</b>  |
| <i>C. orientalis</i> vs <i>C. rubella</i>         | 0.069 | 0.793           |

**Table S4: Comparison of the effect of competition among areas in *Capsella bursa-pastoris*: contrasts on the “species x treatment” term for rosette surface at time  $t_2$**

The retained model was:

block + area + treatment + area x treatment

p-values  $\leq 0.05$  are in bold

| Contrast                    | LR    | p-value         |
|-----------------------------|-------|-----------------|
| Middle-East vs Europe       | 11.93 | <b>0.002</b>    |
| Middle-East vs Central Asia | 2.70  | 0.134           |
| Middle-East vs China        | 22.88 | <b>1.04e-05</b> |
| Europe vs Central Asia      | 0.52  | 0.471           |
| Europe vs China             | 2.52  | 0.135           |
| Central Asia vs China       | 2.84  | 0.135           |

**Table S5: Comparison of the effect of competition among areas in *Capsella bursa-pastoris*: contrasts on the “species x treatment” term for flowers number**

The retained model was:

block + area + treatment + area x treatment

p-values  $\leq 0.05$  are in bold

| Contrast                    | LR    | p-value         |
|-----------------------------|-------|-----------------|
| Middle-East vs Europe       | 6.90  | <b>0.013</b>    |
| Middle-East vs Central Asia | 2.13  | 0.173           |
| Middle-East vs China        | 44.16 | <b>1.82e-10</b> |
| Europe vs Central Asia      | 0.09  | 0.758           |
| Europe vs China             | 24.28 | <b>2.50e-6</b>  |
| Central Asia vs China       | 10.67 | <b>0.002</b>    |

**Table S6: Analyses of covariance to test for the effect of genetic diversity in *C. bursa-pastoris* on (A) rosette surface at time  $t_2$  and (B) flowers number**

A)

|                   | DoF | SS    | F     | p-value         |
|-------------------|-----|-------|-------|-----------------|
| block             | 3   | 85.55 | 23.40 | <b>1.50e-13</b> |
| treatment         | 1   | 32.70 | 26.83 | <b>4.25e-07</b> |
| Pi                | 1   | 5.24  | 4.30  | <b>0.044</b>    |
| block x treatment | 3   | 2.72  | 0.75  | 0.523           |
| block x Pi        | 3   | 0.72  | 0.20  | 0.896           |
| treatment x Pi    | 1   | 5.24  | 4.35  | <b>0.038</b>    |

B)

|                   | DoF | LR    | p-value           |
|-------------------|-----|-------|-------------------|
| block             | 3   | 9.46  | <b>0.024</b>      |
| treatment         | 1   | 135.6 | <b>&lt; 2e-16</b> |
| Pi                | 1   | 3.27  | 0.070             |
| block x treatment | 3   | 1.53  | 0.675             |
| block x Pi        | 3   | 1.27  | 0.737             |
| treatment x Pi    | 1   | 2.39  | 0.122             |

**Figure S1: (A) rosette surface at time  $t_2$  and (B) flowers number as a function of genetic diversity with (grey dots) and without (black dots) competitors**

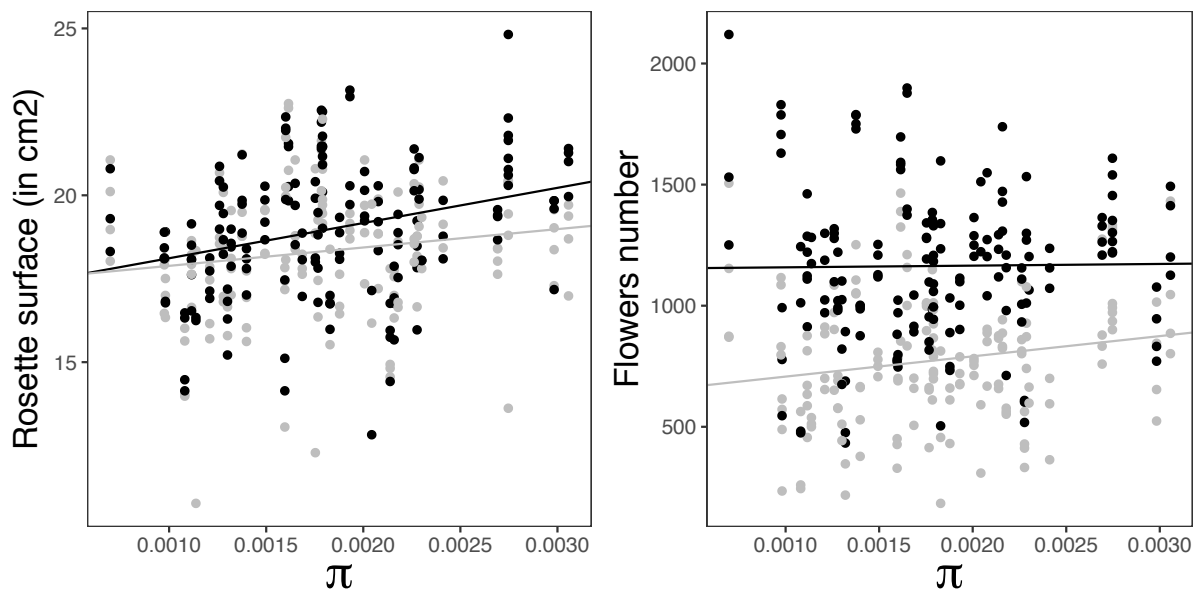

Supplement: Supplementary file [file 214866-1.pdf]
